# Supplementary material
Source: HighWire-hosted journal article supplement (https://cmajopen.ca/highwire/filestream/81281/field_highwire_adjunct_files/0/2020-0005-1-at.pdf)
Supplement: 2020-0005-1-at.pdf [file 2020-0005-1-at.pdf]

## Appendix 1 (as supplied by the authors): Supplemental material

**Supplemental Table S1.** Database codes used to identify eye examination visits and procedures used to treat advanced diabetic retinopathy

| Visit/Procedure                                | OHIP Database Code <sup>a</sup>                                                                           |
|------------------------------------------------|-----------------------------------------------------------------------------------------------------------|
| Eye examination visit                          | A110-A112, A114, A115, A233-A240, A253, K065, K066<br>U233, U235, U236, V401, V402, V404-V409, V450, V451 |
| Intraocular (intravitreal) injection procedure | E149                                                                                                      |
| Laser photocoagulation                         | E154                                                                                                      |
| Vitrectomy surgery                             | E148                                                                                                      |

<sup>a</sup> Abbreviation: OHIP, Ontario Health Insurance Plan

**Supplemental Figure S1.** Proportion of individuals with diabetes receiving an eye examination in the previous 2-years, among First Nations people and other people in Ontario, 2005–2014\*

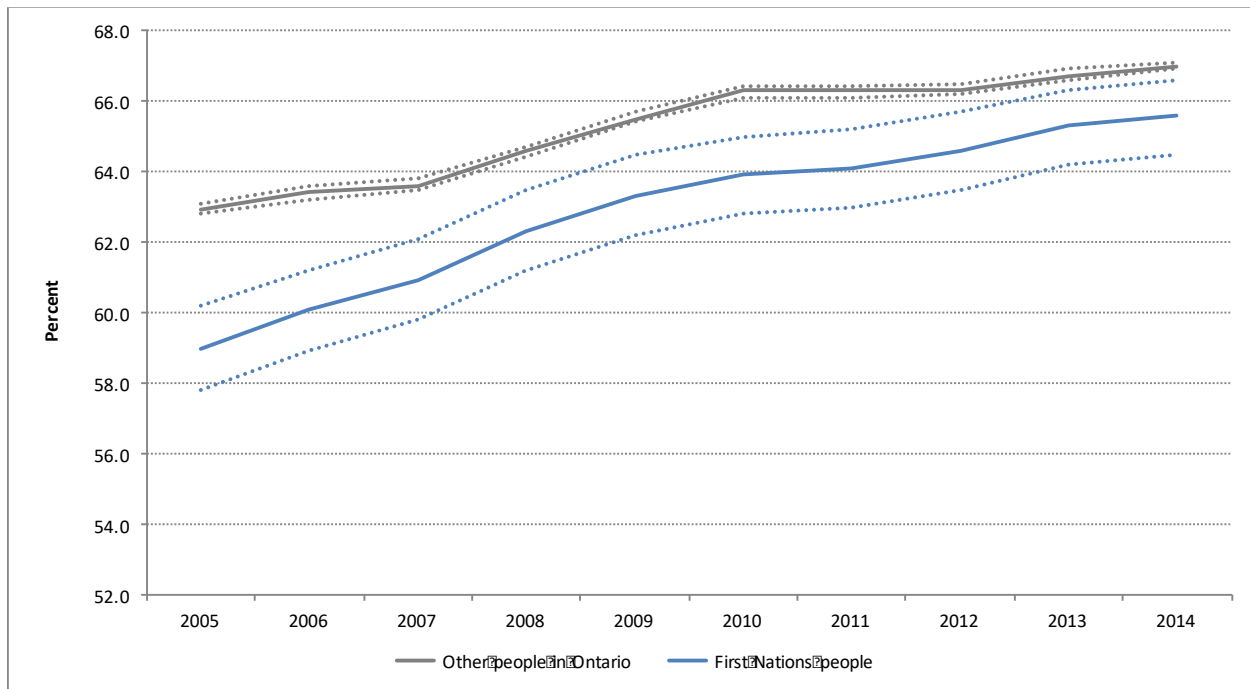

Dashed lines represent 95% confidence intervals.

\* Because OHIP funding of eye examinations changed in 2004, the baseline year was set at 2005 to provide data consistency.

**Supplemental Figure S2.** Proportion of individuals with diabetes receiving an eye examination, among First Nations people living in and outside of First Nations communities in Ontario, 2005–2014\*

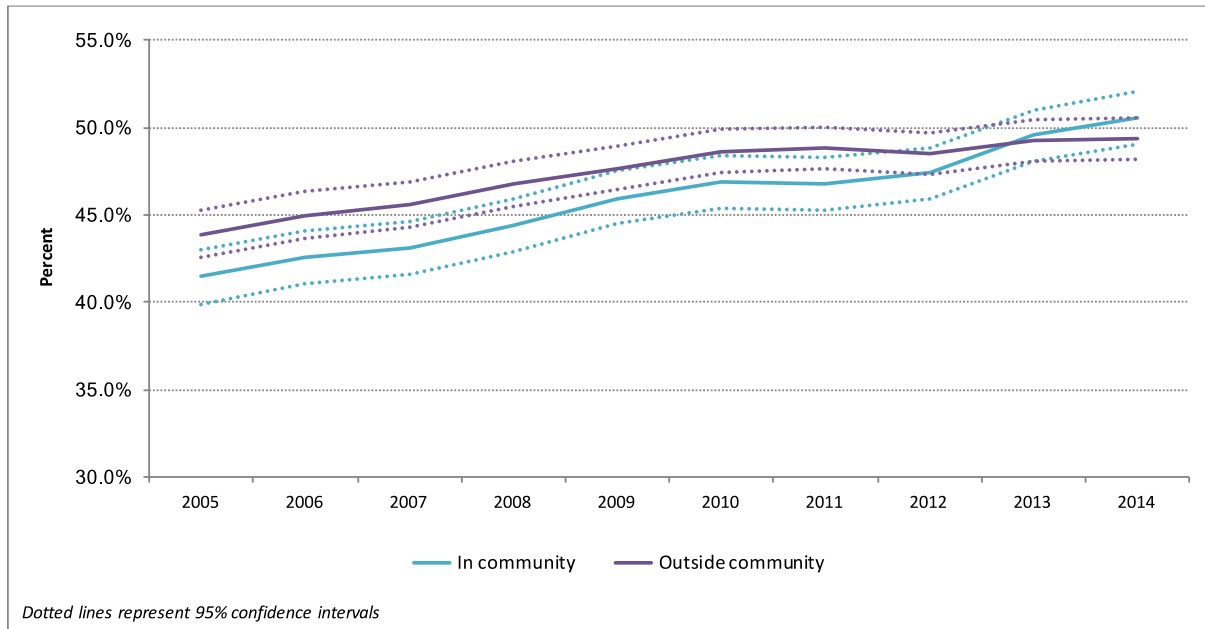

Dashed lines represent 95% confidence interval.

\* Because OHIP funding of eye examinations changed in 2004, the baseline year was set at 2005 to provide data consistency.

**Supplemental Figure S3.** Percentage of First Nations people with diabetes and other people with diabetes receiving an eye examination by age, 2014

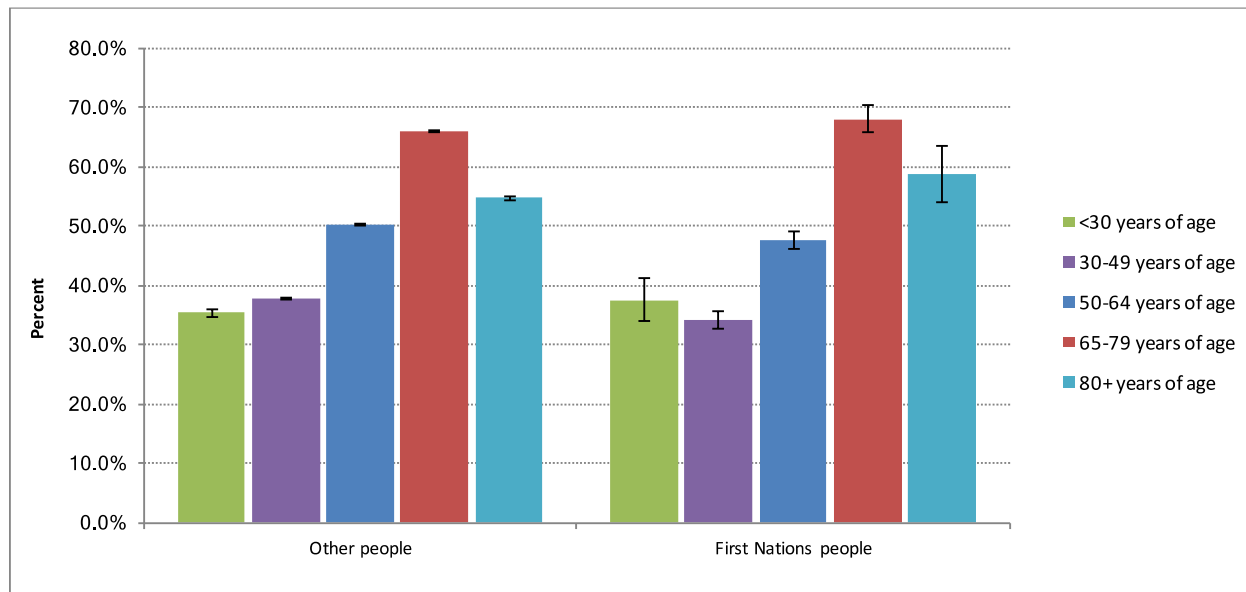

Error bars represent 95% confidence intervals.

**Supplemental Figure S4.** Proportion of individuals with diabetes receiving any treatment for diabetic retinopathy, among First Nations people living in and outside of First Nations communities in Ontario, 2001–2014

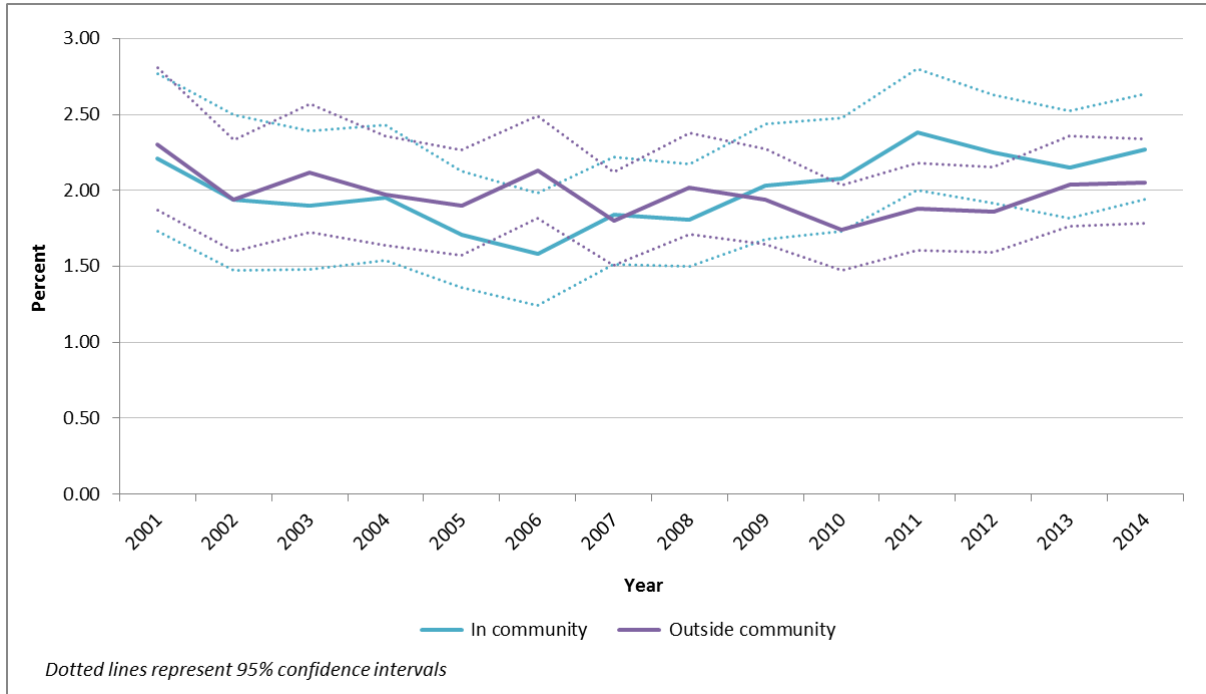

Dashed lines represent 95% confidence interval.
